# Supplementary material for: Land Use Regression Modeling of Outdoor Noise Exposure in Informal Settlements in Western Cape, South Africa
Source: Preprints.org preprint supplement (doi:10.20944/preprints201708.0035.v1), 2017-08-09
Supplement: Supplementary file 1 [file supplementary]

# Land Use Regression Modeling of Outdoor Noise Exposure Variability in Low Income Areas in Western Cape, South Africa

Chloé Sieber <sup>1,2</sup>, Martina S. Ragettli <sup>1,2</sup>, Mark Brink <sup>3</sup>, Olaniyan Toyib <sup>4</sup>, Roslyn Baatjies <sup>4</sup>, Apolline Saucy <sup>1,2</sup>, Nicole Probst-Hensch <sup>1,2</sup>, Mohamed Aqiel Dalvie <sup>4</sup>, Martin Rösli <sup>1,2</sup>

<sup>1</sup> Swiss Tropical and Public Health Institute, Basel 4002, Switzerland; chloe.sieber@gmail.com; martina.ragettli@unibas.ch; apolline.saucy@gmail.com; nicole.probst@unibas.ch; martin.roosli@unibas.ch

<sup>2</sup> University of Basel, Basel 4003, Switzerland

<sup>3</sup> Federal Office for the Environment, CH-3003 Bern, Switzerland; mark.brink@bafu.admin.ch

<sup>4</sup> Centre for Environmental and Occupational Health Research, School of Public Health and Family Medicine, University of Cape Town; olaniyanolan@gmail.com; baatjiesr@cput.ac.za; aqiel.dalvie@uct.ac.za

\* Correspondence: martin.roosli@unibas.ch; Tel.: +41-612-848-383

Academic Editor:

Received: date; Accepted: date; Published: date

## List of the Figures and Tables

### Figures

|             |                                                                                                              |        |
|-------------|--------------------------------------------------------------------------------------------------------------|--------|
| Figure A.1. | Flow chart of the number of outdoor noise measurements                                                       | Page 4 |
| Figure A.2. | Box plots of Lday, Levening, Lnight, LAeq24h, and Lden measured for each of the four study areas             | 5      |
| Figure A.3. | Box plots of Lden measured, (n=134), and Lden predicted (n=364) for each of the four study areas             | 8      |
| Figure A.4. | Scatter plot between the residuals and their fitted values (n=134)                                           | 8      |
| Figure A.5. | Distribution of the residuals of the noise predicted values (n=134)                                          | 9      |
| Figure A.6. | Comparison of the distribution of the residuals of the noise predicted values for each study area separately | 9      |

### Tables

|            |                                                                                                                                                  |           |
|------------|--------------------------------------------------------------------------------------------------------------------------------------------------|-----------|
| Table A.1. | List of geographic information systems (GIS) variables used to develop the LUR noise model, with their date(s) of establishment and their source | Pages 2-3 |
| Table A.2. | List of the variables selected with the univariate analyses to develop the LUR model in order to explain Lden, with n=134                        | 6         |
| Table A.3. | Summary statistics of the GIS variables use in the LUR model developed to explain Lden, with n=134                                               | 7         |

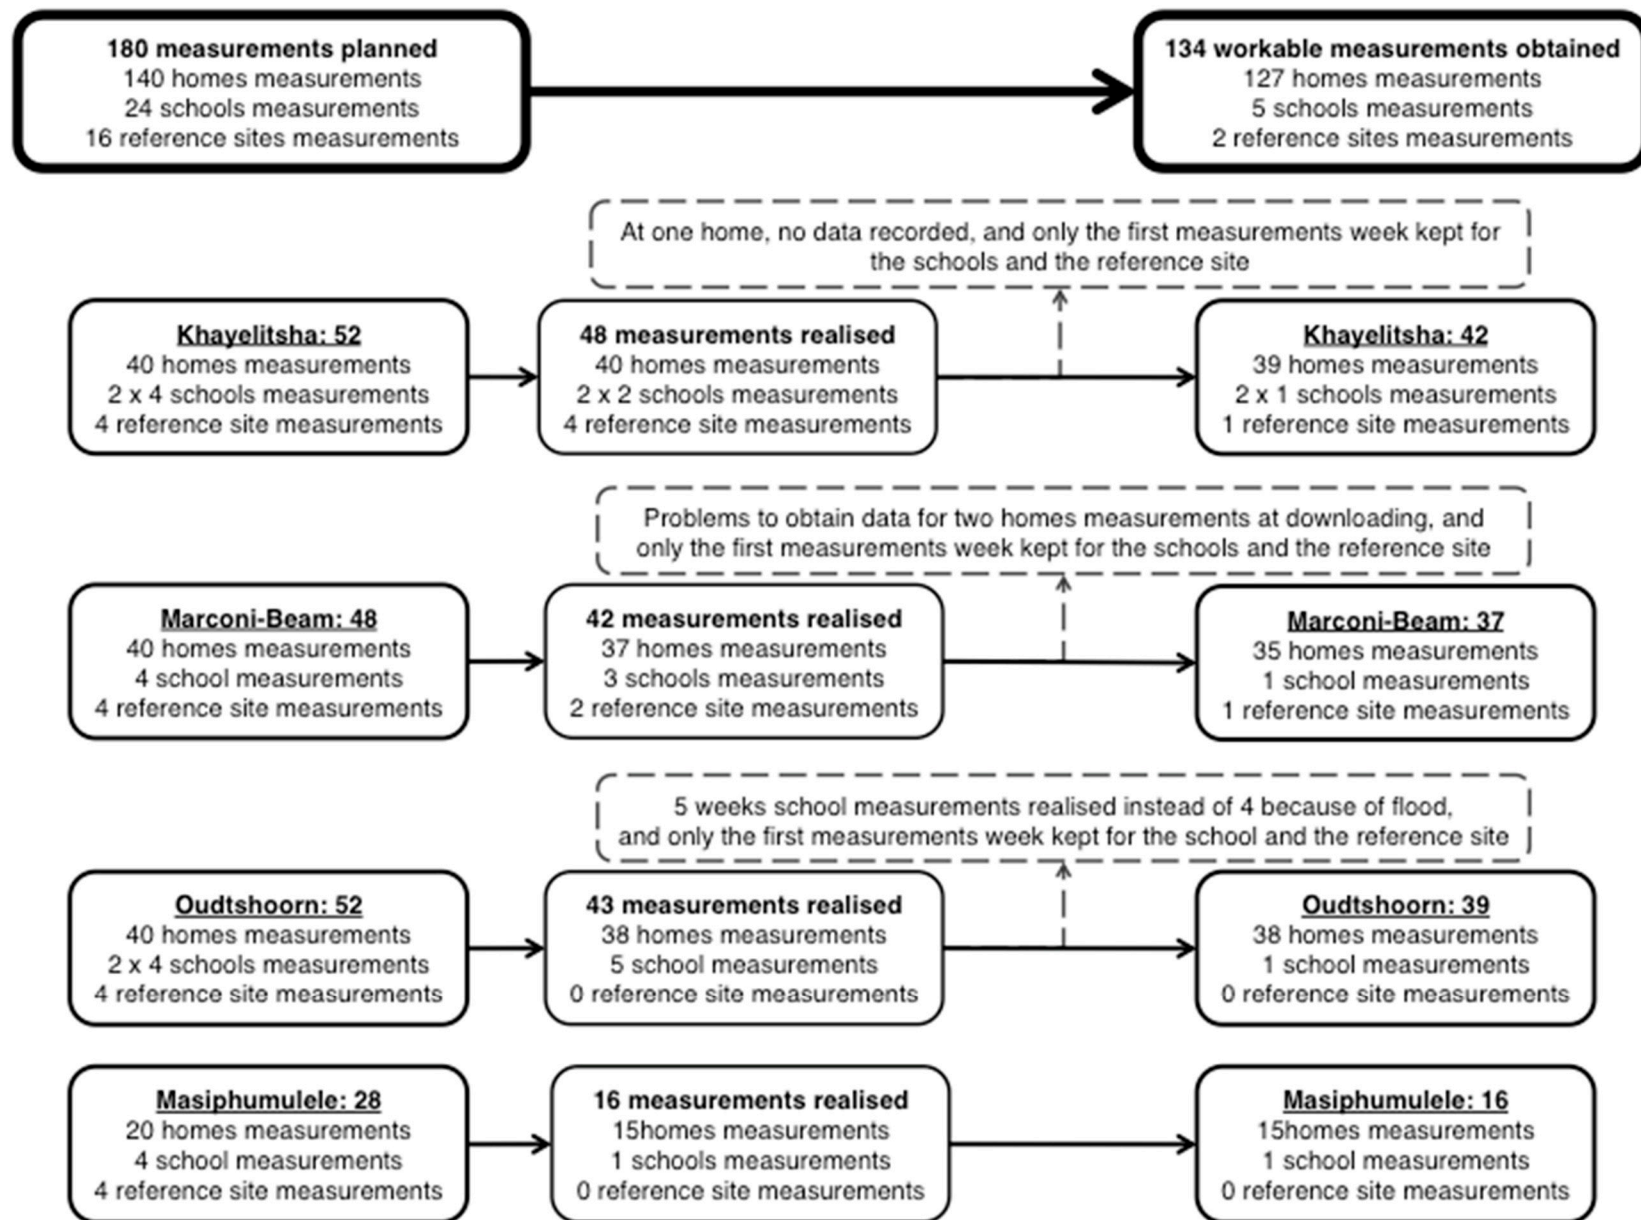

**Figure A.1.** Flow chart showing the number of outdoor noise measurements planned, realized, and used for the analyses. The references sites were difficult to access, therefore so few measurements at these sites were realized.

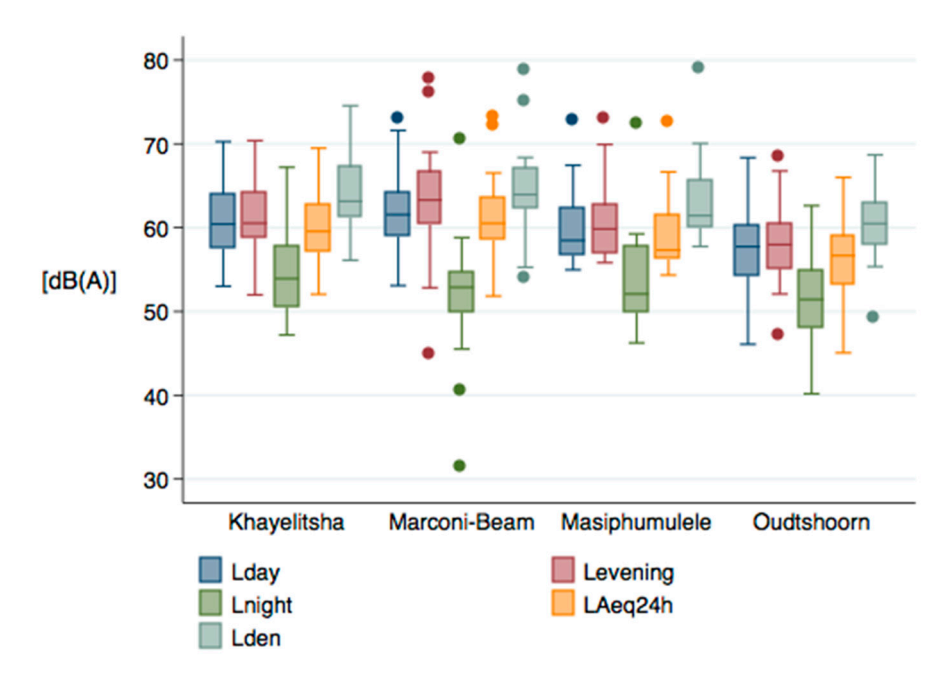

**Figure A.2.** Box plots of Lday, Levening, Lnight, LAeq24h, and Lden measured for each of the four study areas (Khayelitsha (n=42), Marconi-Beam (n=37), Masiphumulele (n=16), and Oudtshoorn (n=39)). The boxes represent the interquartile range (IQR), the middle line represents the median, and the whiskers are as long as 1.5 times the IQR. The dots are the values not comprised in the whiskers range.

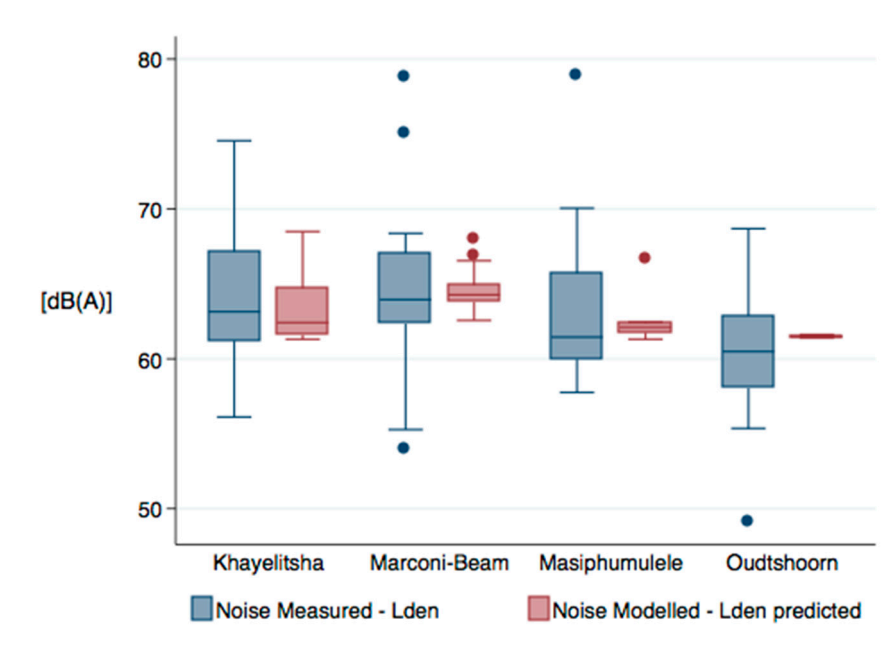

**Figure A.3.** Box plots of Lden measured, (n=134), and Lden predicted (n=134) for each of the four study areas (Khayelitsha, Marconi-Beam, Masiphumulele, and Oudtshoorn). The boxes represent the interquartile range (IQR), the middle line represents the median, and the whiskers are as long as 1.5 times the IQR. The dots are the values not comprised in the whiskers range.

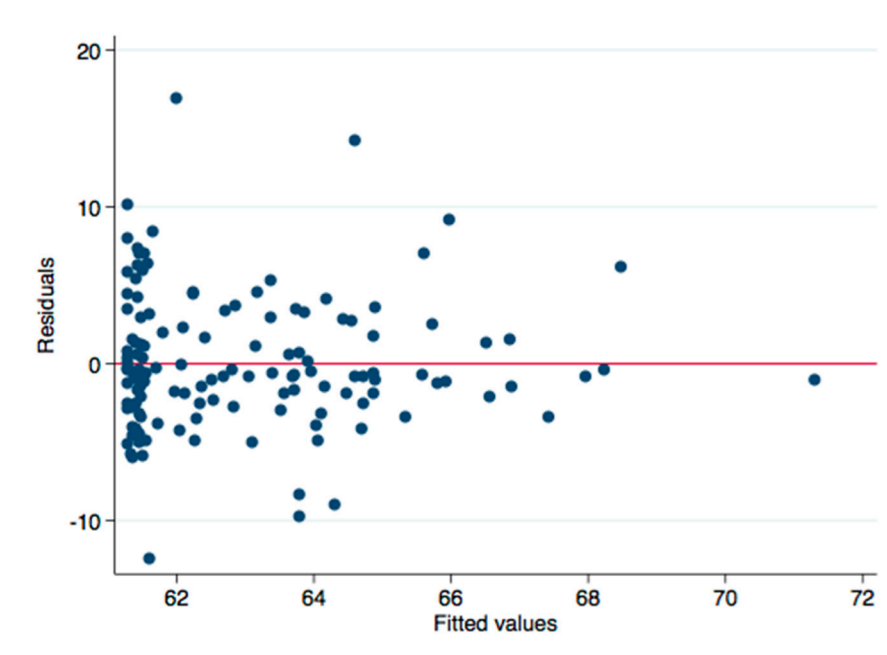

**Figure A.4.** Scatter plot between the residuals and their fitted values (n=134).

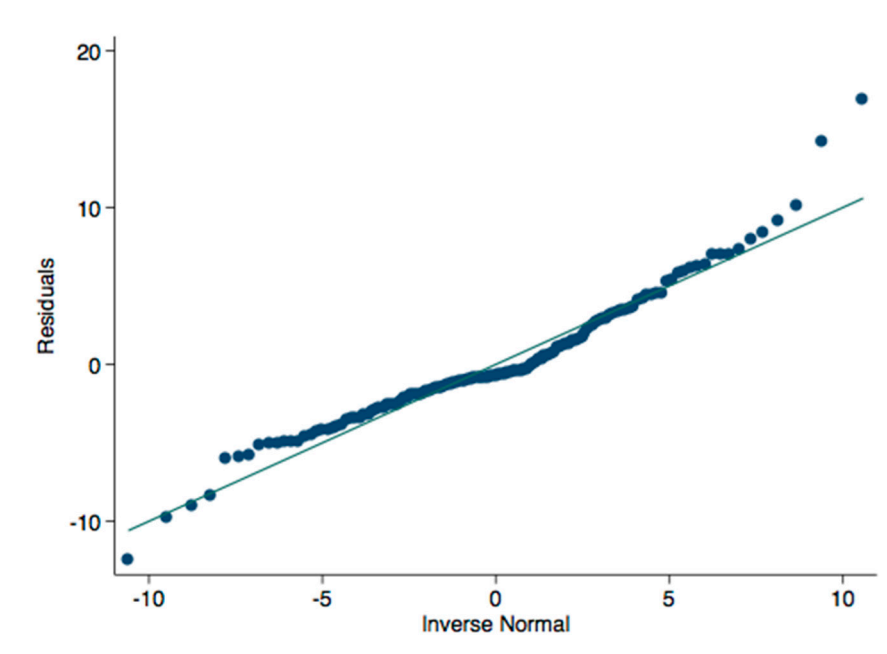

**Figure A.5.** Distribution of the residuals of the noise predicted values (n=134).

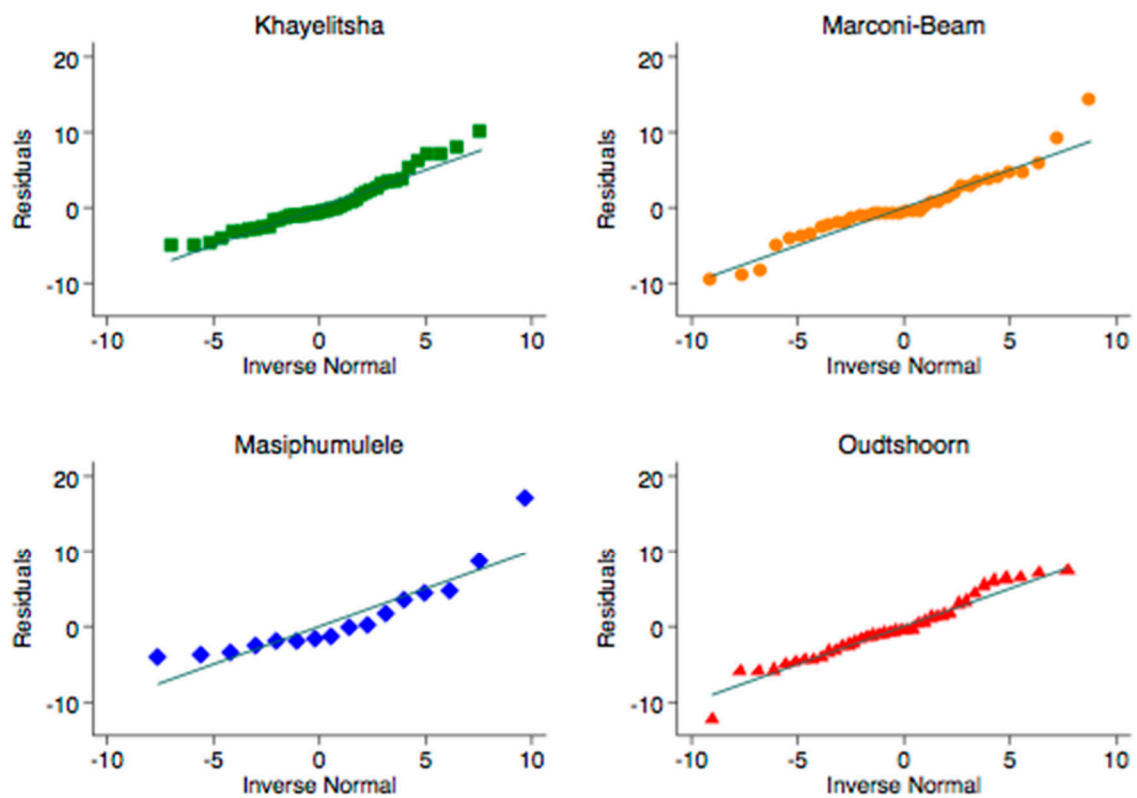

**Figure A.6.** Comparison of the distribution of the residuals of the noise predicted values for each study area separately (Khayelitsha with  $n=42$ , Marconi-Beam with  $n=37$ , Masiphumulele with  $n=16$ , Oudtshoorn with  $n=39$ ).

**Table A.1.** List of geographic information systems (GIS) variables used to develop the land use regression (LUR) noise model, with their date(s) of establishment and their source.

| <i>Categories</i> | <i>GIS variables description</i>                                                                          | <i>Date</i>       | <i>Source</i>                        |
|-------------------|-----------------------------------------------------------------------------------------------------------|-------------------|--------------------------------------|
| Roads             | Roads in Khayelitsha, Marconi-Beam, Masiphumulele                                                         | 2015              | City Maps from the City of Cape Town |
|                   | Roads in Oudtshoorn                                                                                       | 2011              | Municipality of Oudtshoorn           |
| Air               | Airport in Khayelitsha, Marconi-Beam, Masiphumulele                                                       | 2013              | City Maps from the City of Cape Town |
|                   | Airport/Aerodromes in Oudtshoorn                                                                          | 2009/2016         | Municipality of Oudtshoorn           |
| Rail              | Railways tracks in Khayelitsha, Marconi-Beam, Masiphumulele                                               | 2011              | City Maps from the City of Cape Town |
|                   | Railways tracks in Oudtshoorn                                                                             | 2009              |                                      |
| Community         | Churches in Khayelitsha, Marconi-Beam, Masiphumulele                                                      | 2014              | City Maps from the City of Cape Town |
|                   | Churches in Oudtshoorn                                                                                    | 2009              | Municipality of Oudtshoorn           |
|                   | Police stations in Khayelitsha, Marconi-Beam, Masiphumulele                                               | 2013              | City Maps from the City of Cape Town |
|                   | Police stations in Oudtshoorn                                                                             | 2009              | Municipality of Oudtshoorn           |
|                   | Hospitals in Khayelitsha, Marconi-Beam, Masiphumulele                                                     | 2013 - 2014       | City Maps from the City of Cape Town |
|                   | Hospitals in Oudtshoorn                                                                                   | 2003              | Municipality of Oudtshoorn           |
| Buildings         | Household density in Khayelitsha, Marconi-Beam, Masiphumulele                                             | 2012              | City Maps from the City of Cape Town |
|                   | Household density in Oudtshoorn                                                                           | 2006-2010         | Municipality of Oudtshoorn           |
| Land use          | Area of residential land use in Khayelitsha, Marconi-Beam, Masiphumulele                                  | 2012              | City Maps from the City of Cape Town |
|                   | Area of commercial land use in Khayelitsha, Marconi-Beam, Masiphumulele                                   | 2012              | City Maps from the City of Cape Town |
|                   | Area of industrial land use in Khayelitsha, Marconi-Beam, Masiphumulele                                   | 2012              | City Maps from the City of Cape Town |
|                   | Area of buildings land use in Khayelitsha, Marconi-Beam, Masiphumulele                                    | 2012; 2013 - 2014 | City Maps from the City of Cape Town |
|                   | Area of public parks, natural reserves, water bodies land use in Khayelitsha, Marconi-Beam, Masiphumulele | 2012; 2013 - 2014 | City Maps from the City of Cape Town |
|                   | Area of residential land use in Oudtshoorn                                                                | 2006 - 2010       | Municipality of Oudtshoorn           |
|                   | Area of commercial land use in Oudtshoorn                                                                 | 2009              | Municipality of Oudtshoorn           |
|                   | Area of industrial land use in Oudtshoorn                                                                 | 2010              | Municipality of Oudtshoorn           |
|                   | Area of buildings land use in Oudtshoorn                                                                  | 2009              | Municipality of Oudtshoorn           |

---

|            |                                                                                           |                   |                                                                                                                                                                    |
|------------|-------------------------------------------------------------------------------------------|-------------------|--------------------------------------------------------------------------------------------------------------------------------------------------------------------|
| Vegetation | Area of public parks, natural reserves, water bodies land use in Oudtshoorn               | In part from 2009 | Municipality of Oudtshoorn                                                                                                                                         |
|            | Normalized Difference Vegetation Index (NDVI) in Khayelitsha, Marconi-Beam, Masiphumulele | 9th January 2016  | U.S. Geological Survey, Earth Explorer, 2016. Available from <a href="https://earthexplorer.usgs.gov">https://earthexplorer.usgs.gov</a> . Accessed 9 January 2017 |
|            | Normalized Difference Vegetation Index (NDVI) in Oudtshoorn                               | 31 March 2016     | U.S. Geological Survey, Earth Explorer, 2016. Available from <a href="https://earthexplorer.usgs.gov">https://earthexplorer.usgs.gov</a> . Accessed 9 January 2017 |

---

**Table A.2.** List of the variables selected with the univariate analyses to develop the LUR model in order to explain Lden, with n=134. The coefficient (coef.) refers to Lden increase per unit of the predictor variable.

| <i>Variable name</i>                          | <i>Buffer radius [m]</i> | <i>Coef. and 95% CI unit</i>             | <i>Coef.</i> | <i>[95% CI]</i> | <i>R squared</i> | <i>p-value</i> |
|-----------------------------------------------|--------------------------|------------------------------------------|--------------|-----------------|------------------|----------------|
| Households density                            | 750                      | # of homes/ km <sup>2</sup> <sup>1</sup> | 0.02         | [0.00 – 0.03]   | 0.050            | 0.009          |
| Length of big, medium, and small roads        | 100                      | m                                        | 0.01         | [0.00 – 0.02]   | 0.048            | 0.011          |
| Length of medium roads                        | 25                       | m                                        | 0.11         | [0.02 – 0.20]   | 0.041            | 0.018          |
| Length of big, and medium roads               | 500                      | 100m*                                    | 0.08         | [0.01 – -0.14]  | 0.037            | 0.025          |
| Area of industrial land use                   | 200                      | 10,000m <sup>2</sup> *                   | 0.57         | [0.05 – 1.09]   | 0.035            | 0.031          |
| Area of commercial land use                   | 50                       | m <sup>2</sup>                           | 0.04         | [0.00 – 0.08]   | 0.024            | 0.074          |
| Normalized Difference Vegetation Index (NDVI) | 30                       | -1 to + 1                                | -0.07        | [-0.15 – 0.01]  | 0.023            | 0.079          |
| Length of big roads                           | 500                      | 100m*                                    | 0.12         | [-0.03 – 0.26]  | 0.019            | 0.112          |
| Inverse distance to nearest road              |                          | 1/m                                      | 0.97         | [-0.54 – 2.47]  | 0.012            | 0.207          |
| Length of small roads                         | 100                      | m                                        | 0.01         | [-0.01 – 0.03]  | 0.008            | 0.291          |
| Area of nature land use                       | 25                       | 100m <sup>2</sup> *                      | -0.14        | [-0.42 – 0.14]  | 0.008            | 0.319          |
| Length of all roads                           | 25                       | m                                        | 0.01         | [-0.02 – 0.03]  | 0.001            | 0.671          |

<sup>1</sup> The unit of the coefficient value, and the 95% CI were adapted in order to produce readable values.



**Table A.3.** Summary statistics of the GIS variables use in the LUR model developed to explain Lden, with n=134.

| <i>Variable name</i>        | <i>Buffer radius<br/>[m]</i> | <i>Unit of the<br/>variable</i>      | <i>Mean</i> | <i>SD</i> | <i>Min</i> | <i>p25</i> | <i>p50</i> | <i>p75</i> | <i>Max</i> |
|-----------------------------|------------------------------|--------------------------------------|-------------|-----------|------------|------------|------------|------------|------------|
| Households density          | 50                           | # of homes/<br>buffer m <sup>2</sup> | 956521.1    | 1072228.0 | 0.0        | 102782.0   | 335251.0   | 1951392.0  | 3757955.0  |
| Length of medium roads      | 25                           | m                                    | 2.2         | 9.0       | 0.0        | 0.0        | 0.0        | 0.0        | 49.3       |
| Length of big roads         | 200                          | m                                    | 20.6        | 115.3     | 0.0        | 0.0        | 0.0        | 0.0        | 821.9      |
| Area of commercial land use | 50                           | m <sup>2</sup>                       | 2.6         | 20.3      | 0.0        | 0.0        | 0.0        | 0.0        | 223.4      |
| Area of industrial land use | 50                           | m <sup>2</sup>                       | 112.2       | 499.3     | 0.0        | 0.0        | 0.0        | 0.0        | 4357.9     |
